# Supplementary material for: Learning and cognition in highspeed decision making
Source: eLife. 2025 Jun 25;13:RP99634. doi: 10.7554/eLife.99634 (PMC12194133; doi:10.7554/eLife.99634)
Supplement: Figure 3—source data 1. [file elife-99634-fig3-data1.xlsx]

## Sheet: Figure 3B
	Error to VIP (cm)				Error to feeder (cm)
Feeders and visuals	Feeders removed	15° offset	30° offset		15° offset	30° offset
1.53	1.2	5.1	2.44		-5.71	-18.3
0.51	3.36	8.48	2.38		-1.87	-17.08
-2.65	0.44	9.16	-17.72		-1.61	-5.59
2.87	-6.33	-5.07	1.3		-5.1	-19.63
-0.55	5.09	-2.91	-2.01		8.09	-20.69
-5.22	-5.76	4.32	5.7		15.44	-15.77
0.86	1.19	4.14	2.59		-6.15	-23.82
1.01	3.57	1.53	-5.52		-11.61	16.35
-5.68	-5.18	-3.44	0.83		7.5	-19.05
2.31	0.65	5.97	1.09		-4.77	-19.83
-0.49	-0.03	5.4	-6.14		-4.98	-16.74
-6.94	-5.96	0.93	3.6		-11.55	-17.16
5.08	-2.06	-1.37	-2.25		9.85	-19.36
-2.88	-7.97	5.18	-10.88		-4.93	10.72
-0.81	-9.47	2.8	6.02		-7.85	-14.45
1.37	8.17	8.37	2.24		-2.42	-16.3
5.68	10.68	13.11	5.31		3.07	-14.82
10.5	6.73	2.61	0.53		12.39	-18.3
-5.68	0.94	8.19	5.75		-1.92	-13.12
5.98	-3.5	-5.01	7.25		5.12	-12.79
1.63	-3.31	0.97	2.92		-9.22	-15.16
-8.14	-3.47	0.25	-13.06		11.25	-9.87
-6.43	-4.62	-7.22	6.41		3.26	-28.59
4.1	-7.72	3.2	-6.36		13.44	-22.43
8.46	3.87	0.38	6.41		-9.3	-13.78
1.83	10.9	5.61	-1.63		-5.3	-20
2.96	14.07	-4.78	16.91		-6.35	-4.83
-6.25	6.03	8.46	3.36		-1.6	-17.03
-0.46	4.72	2.58	-17.93		-7.88	2.73
2.96	2.24	-2.87	5.18		7.32	-15.01
6.86	1.89	7.09	-3.38		-3.83	-18.08
1.6	6.84	5.7	8.1		-5	-13.66
3.61	-3.19	-0.57	6.94		-10.02	-13.56
6.25	-0.67	9.6	4.44		-0.94	-15.89
2.62	-0.8	3.82	-12.79		-7.38	-31.46
0.45	0.29	-5.15	1.46		-15.93	-17.69
-1.92	-0.58	-1.27	3.26		9	-18.74
-10.67	-0.02	6	9.18		-4.72	-11.78
6.89	-2.98	5.56	8.54		-4.73	-13.53
2.89	9.5	-3.52	-10.7		-14.19	-11.58
3.22	-1.61	-7.77	5.07		2.93	-16.61
-3.29	2.02	3.75	12.97		-7.01	-9.01
-6.85	8.67	-3.26	-11.7		-13.76	9.7
-0.1	8.07	-0.7	2.98		-10.13	-16.98
-0.15	2.56	-1.01	6.01		-11.22	-13.8
2.02	-4.2	-5.12	-8.61		-6.59	-13.34
-5.41	-2.3	0.33	-2.4		-10.55	-23.76
3.87	-4.02	1.16	-11.21		-7.53	10.81
0.51	2.37	2.19	-4.36		13.19	-18.87
-0.61	-3.69	0.01	9.93		-10.93	-11.03
6.04		7.26	1.23		-3.68	-17.49
-11.05		-2.14	6.5		8.77	-15.5
-6.11		1.58	8.68		-9.05	-30.74
-0.57		-3.05	2.67		6.26	-18.56
-5.44		7.63	1.65		-2.36	-18.23
1.39		-13.1	3.73		2.12	-15.7
-1.53		-7.71	-7.51		-3.14	-15.53
-2.96		-0.68	2.17		-10.38	-23.28
-7.21		-1.41	8.83		9.05	-12.86
-7.42		-0.19	3.95		11.61	-17.99
-0.78		5.82	3.74		-4.67	-16.17
6		1.43	0.6		-7.92	-17.38
13.87		3.31	18.58		-8.05	-4.61
5.31		-1.01	-4.01		9.52	-23.81
7.01		4.81	-6.12		-5.53	-23.5
-5.42		-4.1	4.38		7.33	-15.95
-4.4		-6.92	-2.31		3.74	-20.29
10.45		2.89	-6.39		-13.44	-15.18
-3.61		10.14	-0.71		-0.4	21.09
-7.58		-5.1	-5.86		-5.61	-15.94
2.45		-0.92	-11.71		9.91	-10.89
5.75		-2.86	-4.91		-8.06	-16.46
-1.37		10.85	7.66		0.1	-13.23
1.62		-6.35	0.32		-4.49	-21.89
-5.15		4.07	-10.23		-6.5	-11.64
1.13		-0.8	-9.03		10.36	13.3
3.76		0.81	7.58		-9.32	-13.47
3.25		-11.18	10.99		-1.52	-9.85
8.77		-14	-0.48		-3.66	-20.38
1.32		0.92	1.07		-11.4	-22.61
3.78		9.39	-4.71		-0.8	16.99
-1.04		5	0.67		-5.47	-22.68
7.14		-5.95	-0.92		4.35	-20.93
-15.42		4.68	11.48		-5.74	-9.81
2.24		2.68	-25.83		-8.13	2.72
		-1.77	1.73		8.85	-17.66
		-1.32	5.29		-10.4	-14.79
		2.41	1.58		13.57	-20.53
		1.55	-7.83		12.89	-13.65
		1.84	3.78		-9.03	-15.7
		2.56	-0.23		-7.61	-21.96
		-0.43	-6.36		11.18	15.55
		-4.75	5.8		-7	-16.3
		-1.01	-4.15		-10.89	-18.45
		-0.42	-1.07		-9.31	-20.8
		1.91	-2.18		-8.82	19.55
		7.42	4.7		-18	-14.72
		2.9	-2.81		-8.19	19.09
		17.13	-5.3		6.78	-16.45
		0.64	-1.02		-9.59	-20.94
		-2.7	-8.56		7.88	14.05
		1.84	4.02		-8.66	-15.46
		-1.27	10.64		-11.4	-11.6
		5.32	-12.62		-5.38	-10.32
		6.96	13.39		-3.7	-3.94
		10.87	0.26		0.34	-19.9
		-6.48	3.28		-17.33	-17.28
		-3.34	0.55		7.16	-19.32
		2.03	1.42		-8.7	-15.93
		-2.58	6.51		-9	-14.31
		-4.27	6.92		-15	-13.68
		-3.55	5.25		-13.89	-16.49
		-1.75	-1.35		-11.7	20.19
		-6.77	-3.74		-17.4	-18.87
		-4.64	1.43		-14.16	-22.7
		0.88	7.14		12.39	-12.24
		-6.96	-4.58		2.8	17.09
		-1.51	0.47		-11.67	-22.14
		3.44	0.94		-7.63	22.65
		-1.63	-1.08		-11.2	-20.39
		1.06	-6.56		-9.61	-14.62
		3.77	-5.07		-6.86	-17.12
		-2.35	10.27		-13.17	-11.94
		11.25	-1.21		-22.28	-19.87
		4.72	1.15		-6.81	-19.78
		-3.91	5.42		7.02	27.17
		1.32	5.72		12.54	-15.52
		0.06	3.82		11.11	-15.15
		-2.16	6.74		9.29	-11.84
		3.67	10.8		14.3	-11.19
		-10.92	5.48		0	-14.11
		-3.69	2.4		-13.25	-17.94
		-0.59	-5.79		-10.21	16.13
		3.31	11.33		-7.82	-10.7
		5.85	2.08		-4.62	-18.31
		3.56	-7.13		-6.53	-14.27
		9.25	4.63		20.17	-15.42
		1.93	6.22		-7.52	-16.08
		-8.65	4.83		-19.59	-16.53
		4.83	-0.48		-6.8	-16.81
		-11.02	-3.35		0.52	18.93
		3.91	-13.24		-7.36	-9.72
		4.32	8.76		-6.32	-10.39
		-4.82	-4.93		-5.8	-17.73
		-3.56	-15.04		-14.19	-7.32
		-2.56	-15.09		9.07	6.33
		4.6	0.92		-5.53	21.06
		0.59	7.45		-8.5	-13.35
		-7.4	5.27		2.61	-14.54
		-3.18	0.27		-7.93	-22.21
		-0.26	-8.44		-10.88	-14.04
		0.28	9.74		-11.29	-30.71
		9.51	12.65		-0.85	-7.38
		8.43	6.58		-2.28	-11.51
		2.57	-1.8		-6.84	-20.68
		-3.81	8.09		6.38	-10.69
		-4.06	4.42		6.87	-16.42
		-10.13	-3.95		-1.16	-18.78
		-4.02	7.95		-7.56	-11.58
		-1.09	-0.13		9.21	21.7
		8.35	-6.78		-2.97	15.14
		4.82	-4.41		-6.44	-18.07
		-16.85	2.06		-7.66	-16.44
		4.88	-7.84		15.21	-13.92
		1.93	-2.8		-7.95	-19.37
		2.31	-19.8		-8.21	-1.78
		-5.37	-3.98		-15.83	-17.88
		-8.56	-6.21		-2.24	15.14
		-4.42	5.85		6.47	-15.04
		5.09	9.14		-4.05	-12.72
		-12.72	-2.9		2.3	18.81
		6.06	15.48		-3.6	-5.53
		2.95	-1.58		13.7	-19.65
		-8.08	6.45		1.85	-12.99
		-1.83	3.43		-11.52	-16.01
		4.82	-0.17		-6.16	-21.03
		-1.3	3.54		-12.39	-18.25
		-1.63	8.34		-12.13	-13.6
		-3.15	-8.67		-12.68	-14.06
		-1.5	-5.65		-10.05	-16.57
		-1.49	-5.48		-10.83	-17.08
		3.14	1.63		-6.81	-18.65
		-2.64	6.14		-13.27	-14.57
		4	2.21		-7.28	-24.3
		0.59	9.95		-11.77	-31.35
		-1.04	0.66		-10.09	-19.9
		5.34	-0.76		-6.07	21.5
		-4.53	1.53		-6.48	-18.88
		-1.12	-4.97		-12.21	16.73
		7.42	7.89		-4.2	-13.6
		-13.94	5.29		-23.09	-15.73
		-5.57	6.55		5.7	-14.6
		-5.33	5.91		-16.92	-13.82
		1.44	8.63		-9.17	-11.39
		-6.11	6.54		4.9	-13.23
		5.09	-3.35		-6.07	16.35
		-1.55	-1.02		9.72	-21.61
		-9.68	-16.13		-21.15	4.24
		-0.49			11.05
		-7.46			4.33
		15.22			3.5
		-4.03			5.87
		0.5			-12.8
		-1.58			-11.54
		-0.43			-12.5
		3.44			-8.46
		-6.8			-4.28
		10.5			0.14
		0.78			11.63
		2.48			-7.4
		0.68			11.9
		7.29			-3.75
		0			11.44
		-0.35			-11.32
		4.45			-6.68
		1.46			12.8
		6.26			-5.08
		-9.63			0.75
		1.32			-8.84
		-0.23			-10.43
		2.14			-8.15
		2.05			-7.75
		2.16			-8.99
		0			-11.2
		3.35			-7.09
		2.64			-6.69
		5.6			-5.9
		-2.51			7.75
		-1.05			-11.07
		4.11			14.44
		3.39			-6.95
		-1.05			9.54
		-2.61			-8.88
		0.07			-11.06
		-1.36			9.85
		7.12			-4.22
		-1.41			-9.76
		11.75			2.02
		3.41			-6.34
		9.72			-1.08
		2.54			-8.45
		11.72			0.47
		-2.23			-13.77
		2.27			-8.4
		3.59			-6.99
		4.01			-6.84
		7.12			-3.87
		-2.24			-12.03
		2.69			-7.58
		0.32			11.83
		-0.2			-10.98
		-12.2			-1.93
		-6.56			-16.09
		-0.71			-12.06
		3.16			-6.85
		0.28			-10.23
		-5.1			6.28
		3.72			-6.91
		-1.98			-12.59
		1.02			-9.06
		-1.6			-9.52
		-0.99			10.42
		0.09			-11.02
		-3.95			6.22
		-1.39			-10.18
		5.84			-16.57
		6.49			17.24
		5.85			-5.25
		4.81			-5.81
		4.33			-7.09
		-4.3			5.12
		7.01			-17.64
		4.08			-7.65
		-0.5			-11.87
		-5.09			6.73
		6.73			17.96
		7.58			17.57
		3.31			-7.81
		3.1			-7.53
		-7.62			3.27
		-3.98			6.2
		-0.64			10.95
		0.76			-10.19
		-1.43			10.17
		4.6			-6.4
		17.54			5.5
		3.91			-7.47
		-18.25			6.73
		1.63			-12.46
		5.02			-5.24
		1.36			-9.26
		-0.3			-10.52
		-0.57			10.89
		-0.54			-11.73
		-4.82			-6.73
		-2.77			-9.12
		0.14			10.41
		-5.54			5.39
		2.29			-8.82
		-0.54			-10.81
		-12.28			1.42
		-8.15			3.09
		-1.29			-10.15
		-1.17			-10.09
		-3.88			7.63
		7.54			-3.74
		-1.22			10.43
		-7.32			-3.66
		1.28			12.46
		-5.29			-5.89
		2.71			-7.86
		3.45			-6.44
		0.69			-11.93
		-2.28			-11.71
		0.83			-9.93
		1.14			11.97
		9			-1.64
		-1.65			-11.7
		-0.8			10.28
		-6.9			3.96
		10.18			20.81
		-5.27			-5.85
		4.55			-6.1
		-4.97			-6.37
		6.13			-5.32
		-3.96			7
		-2.48			8.82
		6.62			-5.01
		7.52			-3.73
		3.59			-6.65
		-4.66			-6.81
		0			-10.64
		-2.59			8.96
		-6.02			4.34
		-7.91			2.72
		0.99			12.21
		4.64			-6.65
		2.12			-13.9
		-0.46			9.84
		1.53			-9.4
		3.77			-7.24
		3.83			-7.32
		-0.58			-11.3
		-7.09			3.3
		23.09			12.38
		2.07			-13.77
		-6.51			3.9
		-9.57			-1.7
		-2.39			-9.1
		0.87			-10.07
		6.61			-4.11
		1.26			12.71
		11.37			0.75

## Sheet: Figure 3C-E
	Decisions in VR setting				Decision with real objects
Error (cm)	Latency (ms)	Bending duration (ms)		Error (cm)	Latency (ms)	Bending duration (ms)
1.53	48	28		-8.68	74	24
0.51	76	36		9.58	90	34
-2.65	60	26		0.88	96	26
2.87	68	22		-4.33	72	26
-0.55	84	26		4.81	90	28
-5.22	72	24		2.77	80	20
0.86	66	22		5.94	82	28
1.01	62	26		0.06	88	22
-5.68	88	30		4.17	56	24
2.31	60	26		-3.87	82	24
-0.49	54	26		-2.98	56	24
-6.94	82	28		-5.26	82	22
5.08	64	26		11.26	98	26
-2.88	66	24		0.12	58	28
-0.81	64	30		1.32	96	34
1.37	48	34		-2.42	54	26
5.68	68	26		-1.1	86	30
10.5	68	20		8.85	60	26
-5.68	48	22		4.87	72	20
5.98	64	28		-0.23	96	20
1.63	54	28		-0.9	50	22
-8.14	60	30		-4.78	78	20
-6.43	70	30		-2.41	58	26
4.1	58	20		4.36	74	24
8.46	60	28		8.57	76	24
1.83	58	28		-10.62	68	26
2.96	56	24		0.42	54	30
-6.25	66	34		9.96	90	20
-0.46	60	28		0.75	62	24
2.96	64	26		1.7	58	28
6.86	60	28		1.78	70	18
1.6	48	34		1.32	58	24
3.61	58	28		2.3	56	26
6.25	76	26		-2.47	50	24
2.62	62	28		3.98	68	22
0.45	72	38		-1.01	50	22
-1.92	70	28		0.41	56	24
-10.67	74	30		-3.8	56	22
6.89	66	24		-1.86	82	16
2.89	70	22		-1.53	54	24
3.22	66	22		4.13	84	20
-3.29	48	28		-0.74	68	26
-6.85	76	26		-22.41	70	28
-0.1	56	28		-5.28	62	22
-0.15	48	28		0.97	64	26
2.02	60	30		-8	88	20
-5.41	82	32		-6.74	100	20
3.87	60	12		0.1	76	30
0.51	52	26		4.28	66	24
-0.61	74	24		7.21	82	26
6.04	82	28		-4.59	64	28
-11.05	96	24		-1.17	72	22
-6.11	68	16		-2.85	60	30
-0.57	84	20		-5.77	66	24
-5.44	58	24		-2.01	54	28
1.39	62	28		-3.75	70	26
-1.53	86	32		1.41	56	24
-2.96	62	26		-0.48	60	24
-7.21	72	26		3.97	84	28
-7.42	70	26		0.63	64	30
-0.78	56	30		-1.76	64	22
6	68	28		8.57	88	24
13.87	60	24		5.28	64	24
5.31	68	26		-8.61	92	32
7.01	74	22		1.75	54	26
-5.42	76	28		-2.34	72	30
-4.4	48	36		0.37	54	28
10.45	70	36		3.06	74	18
-3.61	72	30		-2.29	72	30
-7.58	54	22		-9.36	66	30
2.45	72	28		-9.87	62	32
5.75	58	34		5.56	62	22
-1.37	74	24		-3.94	68	28
1.62	84	28		-1.4	56	28
-5.15	66	24		7.6	72	26
1.13	64	22		0.51	74	30
3.76	62	22		0.33	66	34
3.25	46	28		-5.1	56	28
8.77	60	24		-7	72	32
1.32	76	26		2.39	62	28
3.78	72	26		-3.09	52	20
-1.04	68	22		4.53	76	22
7.14	58	28		-3.22	78	18
-15.42	84	26		-5.58	56	28
2.24	68	26		1.38	72	24
				5.03	56	24
				0.29	72	24
				4.56	54	30
				4.04	78	30
				2.43	54	28
				6.17	100	32
				-7.29	60	24
				-2.61	70	36
				0.92	56	28
				-1.05	52	22
				4.37	62	30
				-2.33	68	22
				4.41	62	20
				-1.98	56	26
				1.76	64	34
				-5	52	28

## Sheet: Figure 3F-G
	Decisions in VR setting				Decision with real objects
Error abs. (cm)	Distance (m)	Turn (deg)		Error abs. (cm)	Distance (m)	Turn (deg)
8.67696	0.408	26.88		1.53081	0.473	76.71
9.58344	0.488	55.07		0.506981	0.376	117.36
0.881312	0.487	58.24		2.64677	0.341	115.15
4.32666	0.505	54.32		2.87333	0.334	123.07
4.81312	0.635	58.94		0.552108	0.311	131
2.77196	0.727	9.97		5.21744	0.323	127.35
5.94119	0.48	45.92		0.861151	0.367	126.91
0.0636273	0.469	32.05		1.00855	0.432	95.52
4.17385	0.445	47.93		5.6776	0.305	166.18
3.86829	0.539	104.16		2.30635	0.415	116.55
2.9849	0.275	100.84		0.494075	0.398	80.36
5.26026	0.585	50.63		6.94007	0.481	76.93
11.2572	0.491	64.11		5.08375	0.356	139.02
0.11838	0.452	88.49		2.88103	0.357	149.64
1.31513	0.363	122.52		0.814196	0.45	93.88
2.41574	0.252	64.22		1.37435	0.334	123.21
1.09631	0.25	31.71		5.68124	0.374	111.02
8.84618	0.568	97.44		10.4975	0.452	77.4
4.87248	0.649	47.84		5.67981	0.539	49.77
0.230796	0.596	20.6		5.98236	0.498	78.35
0.898273	0.265	27.84		1.62887	0.429	109.39
4.78012	0.692	27.94		8.13697	0.399	117.64
2.40721	0.426	122.99		6.42735	0.33	167.75
4.35514	0.396	22.52		4.10462	0.409	83.85
8.57227	0.388	75.55		8.46299	0.594	19.4
10.6211	0.388	171.45		1.82881	0.471	64.25
0.419602	0.199	99.03		2.95766	0.415	100.1
9.95925	0.54	47.67		6.24617	0.42	102.34
0.752452	0.446	65.39		0.463464	0.451	98.62
1.7014	0.406	150.23		2.96403	0.347	151.03
1.78156	0.449	20.95		6.85804	0.509	60.16
1.31761	0.415	86.76		1.59852	0.41	86.3
2.29789	0.241	52.81		3.60667	0.418	111.25
2.47281	0.271	32.33		6.25324	0.419	89.88
3.97957	0.356	31.3		2.61876	0.391	95.86
1.00604	0.288	40.59		0.454808	0.434	70.04
0.407763	0.408	47.97		1.91674	0.456	100.21
3.7959	0.352	29.5		10.6719	0.329	121.52
1.86111	0.461	23.27		6.89452	0.455	73.58
1.52706	0.248	45.64		2.89438	0.405	108.11
4.13247	0.409	41.52		3.22459	0.478	54.54
0.744584	0.296	141.79		3.28915	0.51	59.95
22.4106	0.64	97.34		6.84777	0.28	149.92
5.27685	0.407	21.84		0.104422	0.402	101.46
0.971444	0.354	24.27		0.14974	0.436	71.47
7.99768	0.302	59.87		2.01687	0.369	99.59
6.74448	0.244	70.67		5.40952	0.285	169.47
0.0967149	0.16	71.57		3.86925	0.429	75.82
4.27964	0.485	56.35		0.509648	0.548	27.32
7.21106	0.614	95.77		0.607426	0.35	161.16
4.59189	0.279	39.38		6.04306	0.553	25.83
1.16977	0.601	52.18		11.0522	0.329	102.23
2.8455	0.235	129.26		6.1077	0.352	159.8
5.77472	0.594	93.22		0.569984	0.423	98.1
2.01202	0.366	158.52		5.43628	0.504	54.01
3.75401	0.854	75.66		1.38755	0.387	88.8
1.40772	0.32	46.55		1.5294	0.312	166.4
0.48111	0.621	70.12		2.96458	0.481	61.28
3.96734	0.284	75.59		7.21127	0.347	161.17
0.633817	0.203	42.81		7.42043	0.359	157.54
1.76253	0.316	26.69		0.776321	0.383	101.46
8.57406	0.708	45.65		5.99928	0.478	61.2
5.28144	0.436	46.93		13.8749	0.433	93.16
8.61167	0.652	51.14		5.31187	0.467	57.19
1.74592	0.31	28.14		7.00725	0.474	74.37
2.3438	0.363	63.58		5.41679	0.324	114.22
0.37152	0.47	128.72		4.39717	0.583	33.7
3.06336	0.381	26.47		10.4537	0.367	120.5
2.29058	0.386	111.45		3.60625	0.412	107.13
9.35537	0.476	76.11		7.57941	0.513	54.89
9.87318	0.441	88.09		2.45271	0.383	115.41
5.56312	0.509	50.79		5.75415	0.442	79.81
3.94366	0.624	70.61		1.37262	0.44	107.23
1.39524	0.346	112.48		1.61516	0.509	54.75
7.60166	0.445	68.45		5.15003	0.325	113.61
0.509648	0.389	64.01		1.13038	0.406	89.87
0.332243	0.321	173.17		3.76305	0.381	103.86
5.10264	0.672	85.73		3.25322	0.455	57.39
6.999	0.38	87.93		8.76579	0.421	106.12
2.39225	0.632	102.8		1.32266	0.428	59.12
3.0937	0.265	15.55		3.77927	0.432	68.42
4.5347	0.534	82.34		1.04134	0.382	114.96
3.21931	0.406	23.78		7.14058	0.459	63.99
5.57756	0.572	77.04		15.4177	0.504	30.62
1.38444	0.17	26.21		2.24423	0.352	151.71
5.03327	0.437	43.98
0.292212	0.472	29.32
4.56118	0.336	130.52
4.04329	0.746	85.72
2.42621	0.463	132.27
6.17309	0.521	111.24
7.28859	0.266	34.43
2.60523	0.287	37.46
0.920357	0.486	107.21
1.04513	0.154	25.64
4.36967	0.513	119.66
2.33448	0.346	21.36
4.4123	0.293	19.81
1.98196	0.441	91.73
1.75984	0.335	37.86
4.99769	0.332	113.99
