# Supplementary material for: Learning and cognition in highspeed decision making
Source: eLife. 2025 Jun 25;13:RP99634. doi: 10.7554/eLife.99634 (PMC12194133; doi:10.7554/eLife.99634)
Supplement: Figure 4—source data 1. [file elife-99634-fig4-data1.xlsx]

## Sheet: Figure 4C-D
				Error to new impact (cm)										Error to ballistic impact (cm)
Training block 1	Training block 2	Training block 3	Training block 4	Training block 5	Training block 6	Training block 7	Training block 8	Training block 9		Training block 1	Training block 2	Training block 3	Training block 4	Training block 5	Training block 6	Training block 7	Training block 8	Training block 9
-4.46	-9.78	-19.82	-14	4.62	-5.77	-3.44	3.41	2.45		-16.24	3.14	-9.11	-1.08	-9.08	-21.17	-18.67	-9.68	-9.78
-0.26	-13.66	-11.43	-3.28	-0.73	-13.44	-2.5	-6.7	-2.41		-16.8	-0.49	-6.38	-12.38	-15.85	0.3	-17.18	5.5	-10.46
-19.14	-11.85	-2.3	-2.91	8.89	-4.79	1.33	-3.7	1.21		-7.42	1.8	8.79	15.61	-3.79	-17.84	-16.55	-9.95	-13.18
-14.65	-19.62	-9.1	-9.28	-0.45	1.11	3.52	4.53	5.73		1.1	-6.45	-6.43	-4.52	-12.73	-14.25	-13.69	-8.18	-20.67
-19.2	-13.59	-12.05	-5.17	-6.9	1.87	0.28	10.35	0.28		6.28	-2.53	1.12	13.05	6.7	-14.87	-12.51	26.19	-12.57
14.84	-15.1	-8.29	5.75	7.27	-0.57	1.68	-17.69	1.16		1.03	1.69	-23.66	-10.05	-5.94	-18.35	-11.29	4.89	-13.63
-21.78	14.59	-9.17	-11.38	2.62	5.51	-10.96	-9.96	1.42		-4.76	-3.51	4.2	0.45	-10.54	-23.26	2.88	-5.72	-11.32
3.93	-11.79	4.86	-7.2	-8.76	-8.28	-11.53	7.75	1.53		-19.59	0.73	-18.28	10.88	4.36	2.96	-27.73	-7.39	-14.63
-18.93	-11.97	-1.13	-0.27	-3.35	1.96	-2.96	-1.9	-4.78		1.85	-1.35	-18.49	-13.1	-9.7	-10.92	-12.9	10.34	6.87
-14.66	-15	-15.04	-2.16	0.98	4.09	0.08	2.41	-1.58		-2.41	-2.93	-3.85	10.74	-14.29	-19.21	-12.83	-14.69	-16.2
-14.12	-18.09	-16.55	6.56	4.47	5.74	-0.95	8.29	-6.9		-1.32	-7.03	-4.27	-9.26	-9.05	-8.01	-12.24	-8.04	4.48
-13.7	18.28	-3.45	-3.73	-0.44	-8.93	-7.91	0.67	2.53		-1.9	2.62	-11.88	-9.59	-13.73	-4.11	4.98	-12.62	-18.17
-21	-18.17	-3.85	-10.57	6.66	2.57	4.36	1.22	-10.98		-11.62	-2.49	8.65	-3.2	-8.78	-10.49	-17.99	-11.64	6.83
-21.42	-14.7	4.74	4.21	5.15	-2.42	1.63	3.16	-4.33		-11.65	-3.21	-10.92	-8.84	-18.29	-11.03	16.49	-13.48	-20.95
3.01	-16.59	-6.66	1.3	-3.1	0.16	-13.56	-3.58	3.16		-13.24	-1.94	-21.47	-13.81	-9.88	-15.6	-0.65	-14.52	18.76
-12	-12.07	4.46	-1.93	-5.94	-5.92	-2.67	-5.68	1.58		0.42	-2.74	-9	-15.69	-8.02	-7.42	-14.97	6.95	-15.9
-22.12	-12.03	11.61	-13.99	-2.31	-2.81	-0.62	-1.16	3.83		-12.76	-0.85	-1.72	0.98	10.44	-18.28	-13.43	-11.87	-11.97
-17.19	17.76	7.56	2.8	-13.51	0.3	4.15	-1.22	2.74		-6.4	3.96	-5.06	-14.36	-1.99	14.15	-8.89	-13.41	-14.53
-16.15	-15.91	0.49	-0.76	-2.4	4.41	-10.38	1.35	-8.07		3.28	-5.87	-13.53	-12.76	15.23	-22.4	2.01	-17.01	3.9
-11.3	13.92	-0.86	-4.97	8.62	3.29	-1.42	-1.61	0.02		-6.32	0.99	-17.16	-17.71	-4.91	-9.72	11.95	-17.3	15.02
-16.75	-13.19	-15.24	3.18	0.76	-10.26	-0.56	6.83	-7.84		-4.34	-0.24	-0.45	-11.84	-18.32	-27.64	-13.41	-10.28	-21.77
11.49	-14.83	-11.97	-8.45	1.33	-7.59	2.2	-4.79	-8.6		-2.54	-3.93	0.21	3.79	-14.52	-19.49	-13.42	-13.25	-4.35
-16.34	18.42	-11.45	-17.94	-8.86	-9.62	-5.09	0.93	-2.42		0.24	5.13	-4.36	2.71	-9.08	-3.66	-8.87	-12.06	-17.26
11.1	9.9	-3.82	-9.71	3.62	5.5	-10.06	-5.38	-7.99		-2.58	-3.68	-18.18	2.73	-16.54	-23.57	1.62	-10.31	-5.26
-16.04	-18.5	-1.54	-7.11	-5.12	-0.29	1.79	-1.71	-9.5		2.69	-6.88	-13.88	-6.87	12.68	-13.13	-14.28	11.37	-23.19
-11.39	-1.22	11.85	-8.28	10.67	6.65	-0.42	-3.33	4.47		1.3	-15.85	-1.2	4.37	-4.65	-6.35	-13.01	-10.32	-12.33
-16.76	-12.51	-5.07	-0.01	-1.37	4.85	0.11	-6.15	1.88		-0.87	-0.2	-7.87	-12.89	-11.75	-22.49	-12.92	11.41	-11.06
-15.71	-19.7	-7.64	4.74	4.28	-0.07	-10.35	6.66	-3.59		2.49	-3.85	-10.41	-10.46	-11.91	12.09	1.38	-6.17	-18.28
-13.59	-12.45	6.11	-8.84	-9.31	-7.64	5.22	11.99	1.63		0.08	-0.81	-7.53	2.58	2.59	-5.78	-11.59	-1.52	-9.71
-11.35	-14.3	-4.16	-13.21	-4.08	5.91	7.63	-0.38	-10.24		0.22	-0.62	-8.79	-1.36	-10.23	-21.75	-9.8	-15.24	2.67
-9.62	15.8	-9.66	8.49	-11.52	-6.01	-4.53	-3.28	-5.05		3.96	2.46	-0.08	-5.15	-2.22	-7.25	7.58	-16.41	7.97
-10.95	-7.96	5.55	-4.34	-10.04	-0.57	-11.19	10.89	-8.45		0.65	4.71	-18.89	10.44	-2.62	-13.93	-6.99	-7.23	-20.52
14.4	-15.57	2.53	-7.36	-1.17	-0.21	6.15	-4.28	1.44		1.27	-3.09	-15.43	3.01	-16.97	-12.95	-7.1	7.51	-10.16
-12.88	-12.84	-10.62	-16.6	-5.56	2	7.72	-1.05	-4.75		-1.32	0.37	5.55	3.04	7.12	-10.97	-5.27	-16.57	-19.92
-19.64	-5.25	-0.61	-5.65	-3.99	-0.07	0.34	-15.32	2.41		-7.83	8.04	14.54	8.97	-17.59	-17.07	-11.73	-3.07	-9.49
-11.63	-13.15	-7.06	-4.09	-8.78	-0.62	-0.21	4.48	2.28		0.54	-0.84	-10.96	14.18	3.87	12.77	-15.73	-7.98	-17.28
-13.3	-10.57	-7.92	9.22	-9.23	-1.08	-2.99	-5.82	-12.36		-1.81	2.03	-5.86	-3.9	2.41	-14.58	-15.48	-7.31	4.3
-13.03	-12.69	-5.05	-9.33	-1.83	2.45	4.64	-0.06	-1.32		2.39	-0.46	-16.61	-8.95	-14.88	-11.14	-12.11	12.66	-15.92
-18.19	-8.36	-15.27	-5.82	-7.65	-9.67	-11.09	-0.67	2.18		-5.74	-5.44	-0.16	-9.94	-8.39	1.79	2.56	-13.38	-10.62
-22.86	-13.7	2.06	-12.69	-6.93	12	0.61	8.48	3.14		-11.34	-4.16	-13.76	0.68	-21.81	-4.95	13.99	-7.01	-10.06
-20.73	-16.98	-10.35	9.51	1.36	5.69	-1.56	-8.32	2.81		-3.41	3.23	-3.07	-3.91	-14.41	-10	-12.05	-10.31	-14.19
19.54	18.09	-8.79	-4.29	-5.34	2.31	-2.54	-18.28	-2.12		5.81	0	-25.23	-8.49	7.71	-10.72	-15.75	-6.21	11.07
-17.11	-2.73	-13.25	2.16	-16.76	4.18	0.98	-1.56	-9.52		4.24	15.33	-0.3	-13.34	-1.54	-8.65	-16.58	11.17	2.89
-9.51	-18.34	-8.86	-8.97	7.56	-9.67	5.25	-8.42	-4.2		3.17	3.51	-9.46	3.1	-5.71	1.89	-21.21	3.56	7.95
-12.34	5.76	-6.07	-0.45	-6.9	7.17	0.68	0.75	-11.7		0.76	-7.36	-7.27	-13.7	5.53	-10.21	-11.97	15.01	0.56
-16.8	-18.84	-5.15	5.27	-2.47	3.03	8.7	3.76	-9.09		1.25	5.87	9.53	-8.19	-10.55	-21.32	-4.18	-21.41	3.12
1.81	-12.9	-3.61	-2.75	-7.32	-4.16	3.03	3.17	-0.04		-11.37	-1.23	-16.24	-10.76	-11.6	9.54	-9.47	-8.74	17.72
-13.88	1.36	-4.87	-6.93	-2.1	-0.27	2.58	-13.83	7.1		-0.51	-5.34	-13.2	-6.46	10.28	-13.15	-10.72	-1.6	22.64
-5.41	-8.62	0.2	9.52	-6.74	3.89	-3.85	-2.35	1.03		7.34	0.33	-15.59	-5.01	-11.74	-12.82	-10.08	15.45	-15.82
16.52	-12.05	-0.26	2.65	-4.26	6.1	6.02	3.57	6.22		3.47	4.45	-13.48	15.81	-11.91	-9.76	-11.5	-16.44	-7.07
9.32	11.15	-6.23	3.08	-9.14	1	-3.47	3.45	5.64		-4.41	-6.52	-12.16	-9.51	-4.41	14.03	-10.18	-16.4	-6.82
12.93	4.19	0.77	5.52	8.95	-5.48	10.01	2.22	7.71		0.73	-13.39	-16.19	-11.04	-4.58	8.58	-7.37	-14.45	-6.07
-11.65	-11.67	2.78	-8.4	-3.59	4.99	3.49	4.53	0.86		-2.07	-1.42	-10.85	-9.46	-9.97	-8.47	-9.61	-8.74	19.49
-14.49	-1.21	-3.87	-2.39	3.32	-1.11	-0.48	-0.98	0.62		1.43	11.04	-9.37	-14.4	-11.81	14.26	12.87	-15.37	-11.66
-18.01	2.96	-8.05	3.61	7.72	0.03	10.63	3.61	-6.59		0.46	-8.54	-5.8	-9.81	-5.37	15.81	-5.56	-8.98	6.34
18.52	-14.62	-8.78	-3.05	6.51	-1.68	-2.66	-2.5	3.46		0.75	-3.38	-23.65	-15.8	-9.22	-11.32	-15.44	-17.88	-8.81
-15.52	-4.46	-6.48	-16.53	-6.83	-0.23	10.49	1.72	-1.11		-2.28	-15.92	-11.77	-5.93	-21.71	-13.65	-7.1	-10	-12.36
18.35	13.74	3.27	1.27	0.18	-0.06	-0.09	-2.48	-2.54		0.5	0.22	-10.14	-15.69	-13.45	-15.95	-18.16	-16.98	-18.82
-13.47	-16.28	-0.95	0.24	-7.49	11.79	-4.1	3.23	-6.45		2.61	2.65	-11.89	-14.88	-23.39	-1.46	13.69	18.36	-6.68
-11.85	-13.67	8.13	-9.73	1.07	2.07	-0.95	-8.55	-3.62		0.15	-1.22	-5.4	1.45	-11.99	-10.9	-16.57	-9.01	-16.8

## Sheet: Figure 4G
		Error to new impact (cm)			Error to feeder (cm)
Full trajectory	Only initial motion	Initial and 15° offset	Initial and 72° offset		Initial and 15° offset	Initial and 72° offset
-5.77	-11.56	-0.61	-7.33		-17.77	-30.71
-13.44	7.86	-1.73	-8.83		16.63	-34.19
-4.79	7.65	-7.1	-13.39		-11.81	-32.5
1.11	-0.49	-0.76	-4.77		12.37	-31.24
1.87	-14.69	-2.18	-2.34		-24.62	-29.69
-0.57	2.24	-1.66	-5.13		-16.95	-32.41
5.51	3.53	5.78	1.97		-20.15	36.71
-8.28	1.52	3.61	-0.39		26.3	35.99
1.96	1.43	1.43	-11.37		-12.94	-35.28
4.09	12.95	-1.2	-4.71		24.77	-10.58
5.74	-5.49	3.98	-1.1		-20.62	32.45
-8.93	-11.22	-1.12	-1.98		16.57	-26.4
2.57	-1.66	-3.93	-9.85		15.6	-33.91
-2.42	-9.04	-5.44	-7.7		-18.77	-28.95
0.16	-0.67	-4.19	-8.78		14.71	-27.92
-5.92	4.3	-9.24	-8.78		17.32	-7.55
-2.81	-0.96	-3.16	-9.9		17.78	37.42
0.3	-1.8	-8.05	0.9		15.54	-26.78
4.41	3.12	4.21	-0.34		30.59	-26.95
3.29	-3.9	-1.28	-5.57		-21.47	-29.36
-10.26	5.52	3.85	-9.25		27.7	-36.68
-7.59	-4.68	0.8	-3.71		26.14	-28.93
-9.62	10.63	-8.78	11.6		15.08	41.67
5.5	9.56	-8.48	-16.7		-15.03	-23.98
-0.29	1.03	3.14	-3.83		-18.38	-27.87
6.65	13.44	-5.56	-9.09		18.29	-33.5
4.85	5.53	0.46	-9.91		-9.06	-29.62
-0.07	1.4	7.83	-6.81		32.8	-30.29
-7.64	-2.41	3.27	4.84		26.02	36.99
5.91	-5.75	4.96	-7.23		-18.27	-33.62
-6.01	-8.05	-8.45	-9.6		14.82	-35.83
-0.57	-5.9	14.78	-12.11		36.96	-31.15
-0.21	-1.93	2.71	-6.84		28.3	-4.85
2	-0.41	-0.25	-3.9		-16.41	-33.13
-0.07	-5.56	4.49	-6.65		28.3	-31.98
-0.62	0.8	-0.65	-0.98		19.52	43.32
-1.08	5.8	-0.17	-2.11		23.27	-30.59
2.45	-2.44	-7.37	-0.52		-24.07	-29.07
-9.67	9.12	-0.08	0.7		-21.91	-26.56
12	-9.18	11.34	-3.07		34.39	-28.93
5.69	-2.18	-11.95	-2.54		-8.65	41.15
2.31	-0.47	-3.9	-4.68		-11.57	-26.91
4.18	-9.02	-9.45	-4.52		-14.24	-35.75
-9.67	-12.38	-4.82	-5.04		21.83	-27.99
7.17	7.03	-11.81	13.01		-9.04	46.76
3.03	5.69	12.37	2.76		-11.21	38.85
-4.16	-1.79	4.26	12.2		-15.34	44.88
-0.27	-11.92	4.22	2.89		-15.38	-34.57
3.89	-9.53	3.49	0.68		-15.28	33.53
6.1	-13.61	11.54	-9.67		-11.37	-36.8
1	-1.17	-6.89	16.51		15.26	45.09
-5.48	5.37	-1.38	0.91		-15.15	-30.43
4.99	0.15	2.98	-1.55		-18.54	32.18
-1.11	0.79	4.94	7.72		-16.88	43.14
0.03	-1.62	1.74	3.26		27.75	35.37
-1.68	-0.38	0.03	4.18		23.8	41.7
-0.23	4.2	-3.91	-0.84		-19.56	32.39
-0.06	5.02	11.36	6.49		-12.11	-36.23
11.79	2.31	6.25	6.29		30.01	-37.17
2.07	-7.94	1.67	-3.44		-15.06	-28.43
-3.44	0.44	0.73	6.42		24.5	-35.38
-2.5	-0.47	2.17	8.42		30.44	-41.41
1.33	-5.71	-5.18	-0.01		-17.84	-27.92
3.52	0.96	4.66	-2.94		-14.05	-19.41
0.28	2.44	-0.09	-7.13		23.09	-35.64
1.68	2.06	-1.09	-1.39		-13.3	-38.15
-10.96	2.97	-4.24	-1.9		24.32	-25.44
-11.53	-14.44	-3.8	-6.3		24.87	-32.02
-2.96		-2	13.01		-15.08	46.55
0.08		-1.86	10.39		21.36	43.93
-0.95		12.07	-4.25		-18.11	35.8
-7.91		-0.56	1.77		-21.76	36.78
4.36		-15.8	-0.38		18.84	-28.35
1.63		-0.46	2.03		21.68	36.55
-13.56		-0.04	1.72		-19.7	38.16
-2.67		4.23	-1.16		-18.71	32.87
-0.62		1.31	-1.1		-13.65	-31.02
4.15		-0.1	11.88		20.14	45.42
-10.38		8.31	3.71		-17.33	38.85
-1.42		-2.64	-0.03		23.13	35.49
-0.56		3.45	0		-19.86	33.56
2.2		-4.82	3.31		-6.35	-28.81
-5.09		0.26	-10.94		-16.07	40.16
-10.06		-1.4	-0.72		20.68	32.76
1.79		7.88	-14.17		-17.42	-38.39
-0.42		3.13	5.21		23.47	39.43
0.11		3.08	-2.67		-14.23	31.38
-10.35		-4.64	2.13		17.74	38.12
5.22		-0.52	3.91		-21.02	-28.96
7.63		-8.09	-5.77		-19.24	37.32
-4.53		-3.72	-0.41		-14.49	35.11
-11.19		-4.18	3.31		-20.89	37.53
6.15		-7.3	-9.63		-20.3	23.23
7.72		-3.74	-8.21		-16.78	-35.14
0.34		-1	0.95		-20.1	35.97
-0.21		3.51	-3.16		-16.61	-33.46
-2.99		-8.25	7.81		-14.06	41.35
4.64		-3.62	-5.19		-18.14	-31.47
-11.09		-0.07	-10.29		-21.18	-33.44
0.61		12.75	5.78		-9.2	40.29
-1.56		5.15	1.73		-15.1	34.79
-2.54		-0.67	3.96		18.94	40.1
0.98		-0.24	6.25		-20.3	37.93
5.25		-8.43	11.4		13.73	42.7
0.68		-12.7	-6.09		10.67	-36.19
8.7		-4.28	4		-17.84	38.79
3.03		5.14	-1.14		-13.76	-28.89
2.58		-4.87	-0.59		-18.35	34.29
-3.85		-3.57	4.16		14.36	36.86
6.02		7.47	0.51		-15.79	35.27
-3.47		-4.31	4		-17.99	38.22
10.01		0.99	6.78		-14.41	41.03
3.49		3.83	0		-18.47	35.76
-0.48		0.33	5.91		20.65	40.92
10.63		-9.12	-3.08		-4.57	31.4
-2.66		2.58	4		-15.88	37.93
10.49		9.9	3.19		-4.07	38.75
-0.09		0.3	-11.73		-18	-34.67
-4.1		2.73	-12.32		-16.12	-33.78
-0.95		4.76	1.08		-16.03	36.34
3.41		-3.34	7.38		-18.53	42.24
-6.7		6.72	-5.77		-15.51	-30.56
-3.7		3.66	8.98		-18.36	41.06
4.53		7.99	1.03		-15.86	-5.96
10.35		4.64	-0.01		-15.96	34.37
-17.69		3.35	-8.43		-15.97	-26.89
-9.96		-9.71	5.33		-28.52	39.47
7.75		-1.45	5.14		23.2	38.82
-1.9		-8.23	-6.24		8.85	29.25
2.41		-4.48	2.21		19.65	36.38
8.29		5.75	-2.02		-13.36	-33.16
0.67		14.77	7.18		-9.98	-40.86
1.22		-2.88	11.22		21.57	-43.74
3.16		-1.13	-0.04		-15.58	-35.73
-3.58		9.81	5.12		-11.57	-40.2
-5.68		-10.96	-4.32		9.25	-28.4
-1.16		13.71	-3.94		-10.5	-31.5
-1.22		4.61	-0.77		-16	-33.78
1.35		-4.57	6.54		18.52	-41.3
-1.61		-4.39	1.96		19.92	-16.68
6.83		-0.3	-13.11		25.12	-36.6
-4.79		0.14	7.97		25.5	-40.49
0.93		8.25	-0.23		-15.19	-34.25
-5.38		6.97	-4.93		-17.58	-31.98
-1.71		9.04	-1.16		-14.81	-32.95
-3.33		-1.62			-20.69
-6.15		2.21			-18.14
6.66		2.96			-18.54
11.99		-1.68			-21.29
-0.38		-2.61			-20.26
-3.28		-8.94			13.21
10.89		-3			21.56
-4.28		-0.71			24.74
-1.05		7.72			-11.34
-15.32		5.4			-18.81
4.48		-9.11			14.67
-5.82		-9.59			10.84
-0.06		5.47			-16.45
-0.67		2.57			-20.69
8.48		6.07			-13.82
-8.32		-5.56			19.56
-18.28		5.82			30.93
-1.56		-8.56			-25.6
-8.42		-12.04			12.13
0.75		-6.76			19.11
3.76		4.54			-15.22
3.17		3.38			-7.7
-13.83		8.4			-14.81
-2.35		1.39			-16.05
3.57		1.99			-17.82
3.45		-0.83			-17.65
2.22		-9.38			14.64
4.53		2.71			-21.34
-0.98		-3.48			18.35
3.61		-10.75			19.46
-2.5		0.16			-24.49
1.72		5.87			-18.59
-2.48		-3.55			-21.71
3.23		0.56			-16.45
-8.55		-2.9			19.43
2.45		0.88			-26.99
-2.41		-0.26			-19.4
1.21		-8.71			-16.65
5.73		-2.66			21.48
0.28		3.05			-21.91
1.16		-0.99			-23.91
1.42		3.86			-13.85
1.53		-5.48			-27.92
-4.78		-1.84			21.21
-1.58		15.65			-8.18
-6.9		-3.25			-22.43
2.53		-1.14			21.78
-10.98		-0.59			-24.74
-4.33		-5.88			18.94
3.16		1.25			-22.81
1.58		-5.27			21.45
3.83		-1.72			15.98
2.74
-8.07
0.02
-7.84
-8.6
-2.42
-7.99
-9.5
4.47
1.88
-3.59
1.63
-10.24
-5.05
-8.45
1.44
-4.75
2.41
2.28
-12.36
-1.32
2.18
3.14
2.81
-2.12
-9.52
-4.2
-11.7
-9.09
-0.04
7.1
1.03
6.22
5.64
7.71
0.86
0.62
-6.59
3.46
-1.11
-2.54
-6.45
-3.62

## Sheet: Figure 4H-I
Error abs. (cm)	Distance (m)	Required turn (°)
5.77	0.438	34.7
13.44	0.409	41.19
4.79	0.349	153.43
1.11	0.363	110.43
1.87	0.394	89.24
0.57	0.481	12.44
5.51	0.476	13.34
8.28	0.692	30.96
1.96	0.351	174.32
4.09	0.475	16.25
5.74	0.465	61.58
8.93	0.335	170.02
2.57	0.386	129.19
2.42	0.352	136.61
0.16	0.415	56.95
5.92	0.344	139.92
2.81	0.463	24.82
0.3	0.455	52.32
4.41	0.466	39.24
3.29	0.417	53.51
10.26	0.456	27.92
7.59	0.366	134.42
9.62	0.339	152.2
5.5	0.467	42.4
0.29	0.504	10.21
6.65	0.416	70.12
4.85	0.481	41.49
0.07	0.557	34.26
7.64	0.339	157.25
5.91	0.392	105.21
6.01	0.321	153.11
0.57	0.339	152.24
0.21	0.349	132.66
2	0.322	177.3
0.07	0.399	106.5
0.62	0.456	53.2
1.08	0.492	4.44
2.45	0.311	156.04
9.67	0.387	107.1
12	0.41	86.74
5.69	0.385	94.87
2.31	0.312	151.7
4.18	0.361	123.37
9.67	0.576	44.42
7.17	0.396	96.34
3.03	0.478	33.96
4.16	0.453	66.47
0.27	0.361	102.26
3.89	0.408	97.82
6.1	0.555	47.16
1	0.41	75.73
5.48	0.253	73.24
4.99	0.497	36.11
1.11	0.532	26.68
0.03	0.462	52.66
1.68	0.479	15.95
0.23	0.538	27.9
0.06	0.36	109.34
11.79	0.436	70.47
2.07	0.42	84.27
3.44	0.453	46.33
2.5	0.44	61.31
1.33	0.446	29.03
3.52	0.447	66.11
0.28	0.385	97.56
1.68	0.413	58.24
10.96	0.332	107.33
11.53	0.505	96.34
2.96	0.52	23.92
0.08	0.369	135.21
0.95	0.455	114.78
7.91	0.41	60.7
4.36	0.492	25.35
1.63	0.344	112.25
13.56	0.395	96.5
2.67	0.337	131.54
0.62	0.401	153.31
4.15	0.384	43.4
10.38	0.392	104.32
1.42	0.346	118.93
0.56	0.432	98.63
2.2	0.504	18.87
5.09	0.296	161.13
10.06	0.403	73.03
1.79	0.384	110.06
0.42	0.439	67.66
0.11	0.434	50.3
10.35	0.388	47.12
5.22	0.451	66.24
7.63	0.474	57.99
4.53	0.45	48.16
11.19	0.388	128.31
6.15	0.425	75.55
7.72	0.442	74.68
0.34	0.342	105.26
0.21	0.343	141.19
2.99	0.361	128.83
4.64	0.451	35.31
11.09	0.415	44.52
0.61	0.387	88.09
1.56	0.502	17.93
2.54	0.487	15.04
0.98	0.32	140.93
5.25	0.393	72.65
0.68	0.426	47.13
8.7	0.429	68.98
3.03	0.475	66.47
2.58	0.464	12.4
3.85	0.503	20.77
6.02	0.461	66.04
3.47	0.342	150.16
10.01	0.329	116.57
3.49	0.446	1.95
0.48	0.324	124.54
10.63	0.375	111.25
2.66	0.318	152.47
10.49	0.44	80.69
0.09	0.325	152.53
4.1	0.336	119.05
0.95	0.331	159.29
3.41	0.446	67.73
6.7	0.351	115.89
3.7	0.29	140.39
4.53	0.386	94.83
10.35	0.596	24.78
17.69	0.444	21.8
9.96	0.332	143.71
7.75	0.367	127.33
1.9	0.469	39.85
2.41	0.442	76.89
8.29	0.418	89.58
0.67	0.484	7.65
1.22	0.437	21.23
3.16	0.451	64.7
3.58	0.345	144.19
5.68	0.416	70.44
1.16	0.353	114.38
1.22	0.355	100.01
1.35	0.388	122.01
1.61	0.452	80.18
6.83	0.447	73.02
4.79	0.36	153.23
0.93	0.323	139
5.38	0.366	141.39
1.71	0.336	143.63
3.33	0.424	35.54
6.15	0.413	83.9
6.66	0.375	66.56
11.99	0.453	41.27
0.38	0.372	101.89
3.28	0.325	146.31
10.89	0.414	101.48
4.28	0.411	59.12
1.05	0.466	64.58
15.32	0.405	118.35
4.48	0.471	71.2
5.82	0.372	91.57
0.06	0.571	45
0.67	0.343	151.56
8.48	0.377	116.06
8.32	0.333	173.94
18.28	0.458	1.99
1.56	0.432	64.94
8.42	0.451	56.31
0.75	0.421	66.56
3.76	0.508	9.87
3.17	0.402	85.91
13.83	0.487	50.81
2.35	0.417	72.6
3.57	0.573	9.27
3.45	0.482	30.51
2.22	0.39	102.99
4.53	0.467	11.42
0.98	0.498	40.6
3.61	0.459	25.35
2.5	0.396	115.53
1.72	0.437	70.81
2.48	0.311	112.6
3.23	0.365	102.83
8.55	0.327	169.7
2.45	0.352	54.5
2.41	0.438	8.13
1.21	0.456	96.02
5.73	0.47	41.7
0.28	0.298	169.53
1.16	0.367	99.99
1.42	0.435	64.65
1.53	0.363	113.49
4.78	0.411	67.83
1.58	0.328	101.2
6.9	0.432	46.04
2.53	0.489	40.6
10.98	0.457	39.27
4.33	0.445	123.81
3.16	0.334	136.08
1.58	0.354	143.59
3.83	0.466	62.05
2.74	0.405	111.33
8.07	0.517	6.57
0.02	0.36	89.5
7.84	0.395	81.43
8.6	0.475	118.67
2.42	0.428	92.22
7.99	0.474	18.38
9.5	0.329	115.95
4.47	0.435	83.89
1.88	0.341	120.82
3.59	0.442	68.02
1.63	0.268	106.25
10.24	0.423	63.43
5.05	0.368	104.04
8.45	0.377	52.17
1.44	0.4	84.06
4.75	0.332	132.58
2.41	0.44	77.53
2.28	0.52	26.9
12.36	0.411	62.59
1.32	0.411	75.96
2.18	0.406	93.41
3.14	0.385	69.29
2.81	0.388	105.71
2.12	0.474	43.91
9.52	0.456	43.47
4.2	0.559	28.07
11.7	0.493	15.21
9.09	0.404	76.06
0.04	0.453	66.32
7.1	0.435	69.78
1.03	0.384	96.34
6.22	0.419	80.67
5.64	0.428	72.9
7.71	0.363	124.46
0.86	0.481	45.75
0.62	0.403	85.86
6.59	0.488	40.64
3.46	0.417	84.47
1.11	0.361	83.57
2.54	0.432	69.39
6.45	0.492	8.13
3.62	0.354	71.11

## Sheet: Figure 4 J-K
	Initial and 15° offset			Initial and 72° offset
	Error abs. (cm)	Latency (ms)		Error abs. (cm)	Latency (ms)
	8.43	192		7.33	44
	12.7	94		8.83	54
	0.61	44		13.01	36
	1.73	46		13.39	50
	7.1	54		10.39	66
	0.76	62		4.25	44
	2.18	58		4.77	54
	1.66	58		2.34	46
	4.28	56		5.13	48
	5.78	64		1.97	54
	3.61	50		1.77	76
	1.43	56		0.38	60
	1.2	48		2.03	60
	5.14	54		1.72	88
	4.87	68		1.16	64
	3.98	54		1.1	64
	3.57	66		0.39	64
	1.12	46		11.88	72
	3.93	42		3.71	58
	7.47	52		0.03	106
	4.31	50		11.37	64
	5.44	70		0	64
	0.99	74		4.71	52
	3.83	64		1.1	52
	4.19	60		3.31	52
	9.24	52		10.94	52
	3.16	76		1.98	52
	0.33	46		9.85	68
	9.12	68		0.72	86
	8.05	72		14.17	70
	4.21	54		7.7	54
	2.58	62		8.78	46
	1.28	38		5.21	64
	9.9	58		2.67	64
	0.3	54		2.13	104
	2.73	98		3.91	38
	3.85	70		5.77	92
	4.76	72		0.41	86
	0.8	70		8.78	36
	8.78	54		3.31	70
	3.34	74		9.9	80
	6.72	46		9.63	60
	3.66	52		0.9	46
	8.48	60		0.34	44
	3.14	36		8.21	62
	5.56	54		5.57	54
	7.99	66		9.25	62
	0.46	40		0.95	104
	4.64	46		3.16	60
	7.83	80		3.71	46
	3.27	84		11.6	46
	3.35	46		16.7	122
	9.71	50		3.83	68
	4.96	70		9.09	48
	1.45	58		7.81	64
	8.45	60		9.91	54
	14.78	56		6.81	64
	8.23	60		5.19	56
	2.71	46		4.84	76
	0.25	66		10.29	56
	4.49	62		5.78	72
	0.65	66		1.73	64
	4.48	58		3.96	62
	0.17	68		7.23	64
	5.75	110		9.6	72
	14.77	60		12.11	46
	7.37	58		6.25	62
	0.08	62		6.84	52
	11.34	44		11.4	92
	2.88	70		3.9	122
	11.95	50		6.09	42
	3.9	92		6.65	60
	1.13	58		4	78
	9.81	60		0.98	70
	9.45	68		1.14	76
	10.96	86		2.11	54
	13.71	66		0.59	64
	4.82	56		0.52	68
	4.61	90		4.16	154
	11.81	66		0.51	60
	12.37	88		4	56
	4.26	52		6.78	94
	4.57	58		0.7	136
	4.39	88		0	54
	4.22	56		3.07	48
	3.49	94		5.91	58
	0.3	150		3.08	68
	0.14	86		2.54	82
	11.54	64		4.68	56
	8.25	54		4.52	36
	6.97	50		4	82
	6.89	64		3.19	90
	9.04	68		5.04	64
	1.38	60		13.01	46
	1.62	46		11.73	68
	2.98	82		12.32	74
	2.21	64		1.08	80
	4.94	38		2.76	64
	1.74	50		7.38	98
	2.96	82		12.2	112
	0.03	102		2.89	44
	1.68	48		5.77	42
	3.91	72		8.98	72
	2.61	104		0.68	70
	8.94	62		9.67	40
	3	62		1.03	70
	11.36	102		0.01	64
	0.71	44		16.51	66
	6.25	54		8.43	48
	7.72	70		0.91	72
	1.67	54		5.33	70
	5.4	62		1.55	58
	0.73	90		5.14	90
	9.11	110		7.72	74
	2.17	56		3.26	42
	9.59	82		6.24	54
	5.18	72		2.21	62
	5.47	88		2.02	40
	4.66	62		4.18	36
	0.09	60		0.84	70
	1.09	60		7.18	62
	2.57	52		6.49	66
	4.24	54		11.22	76
	6.07	98		0.04	44
	5.56	38		5.12	54
	3.8	72		6.29	48
	5.82	78		4.32	62
	2	64		3.94	80
	1.86	48		0.77	54
	12.07	68		3.44	54
	0.56	56		6.54	68
	15.8	50		1.96	84
	8.56	72		6.42	36
	0.46	58		13.11	70
	12.04	42		7.97	40
	0.04	60		8.42	60
	4.23	80		0.23	76
	6.76	74		4.93	56
	1.31	46		1.16	66
	4.54	70		0.01	60
	0.1	70		2.94	62
	3.38	54		7.13	44
	8.4	72		1.39	98
	8.31	56		1.9	64
	2.64	68		6.3	108
	3.45	40
	1.39	42
	4.82	38
	0.26	62
	1.4	48
	1.99	48
	7.88	46
	3.13	52
	0.83	80
	9.38	60
	3.08	84
	2.71	44
	3.48	56
	4.64	62
	0.52	52
	10.75	64
	8.09	58
	0.16	42
	5.87	76
	3.55	62
	3.72	62
	0.56	76
	4.18	132
	2.9	54
	0.88	76
	0.26	42
	8.71	54
	2.66	94
	3.05	38
	0.99	54
	3.86	62
	7.3	80
	3.74	76
	5.48	62
	1	98
	1.84	36
	3.51	64
	8.25	60
	15.65	58
	3.25	46
	1.14	38
	0.59	90
	3.62	108
	5.88	96
	0.07	70
	12.75	64
	1.25	54
	5.27	72
	5.15	74
	0.67	68
	0.24	92
	1.72	44
