# Supplementary material for: Learning and cognition in highspeed decision making
Source: eLife. 2025 Jun 25;13:RP99634. doi: 10.7554/eLife.99634 (PMC12194133; doi:10.7554/eLife.99634)
Supplement: Figure 5—source data 1. [file elife-99634-fig5-data1.xlsx]

## Sheet: Figure 5B-C
Error abs. (cm)
untrained larger	untrained lower
8.05	5.09
1.07	1.03
0.43	7.01
0.46	0.33
1.68	4.5
0.58	0.05
1.31	0.7
2.94	5.15
2.46	0.21
0.59	5.52
0.21	0.26
6.05	4.17
9.74	1.17
2.33	2.71
0.32	0.18
1.91	0.73
1.47	9.29
0.41	2.51
2.26	0.61
9.06	7.52
0.48	0.33
0.3	4.16
0.07	8.57
0.8	1.82
12.43	3.22
8.57	1.66
6.31	9.79
1.91	0.39
0.21	7.44
0.46	0.97

## Sheet: Figure 5D-E
	untrained larger					untrained lower
Magnitude of error generalized (cm)	Magnitude of error substitute (cm)	Magnitude of error ballistic (cm)			Magnitude of error generalized (cm)	Magnitude of error substitute (cm)	Magnitude of error ballistic (cm)
8.05	13.95	8.12			5.09	11.54	6.39
1.07	4.41	14.95			1.03	3.58	10.25
0.43	5.31	16.94			7.01	13.32	4.53
0.46	4.73	15.93			0.33	1.47	11.37
1.68	6.27	11.89			4.5	5.98	7.25
0.58	4.13	15.95			0.05	4.69	12.24
1.31	1.49	13.95			0.7	7.2	7.16
2.94	0.18	11.51			5.15	8.87	7.15
2.46	8.26	13.5			0.21	2.74	10.3
0.59	2.95	13.12			5.52	13.66	4.53
0.21	3.94	16.78			0.26	1.86	11.15
6.05	4	9.52			4.17	4.74	7.49
9.74	6.31	4.55			1.17	4.52	7.48
2.33	4.67	13.84			2.71	7.57	9.58
0.32	4.63	16.23			0.18	2.26	11.34
1.91	2.17	17.89			0.73	3.09	13.04
1.47	3.42	15.21			9.29	8.91	2.11
0.41	4.55	17.41			2.51	5.99	7.47
2.26	1.81	12.63			0.61	1.82	9.49
9.06	7.38	6.79			7.52	6.38	3.7
0.48	4.73	16.18			0.33	5.75	10.57
0.3	6.55	15.51			4.16	7.97	5.51
0.07	4.42	13.53			8.57	14.13	3.43
0.8	4.26	15.86			1.82	7.96	10.26
12.43	10.62	4.76			3.22	7.66	9.08
8.57	12.41	6.17			1.66	3.22	12.53
6.31	10.38	8.67			9.79	8.14	0.89
1.91	5.57	13.06			0.39	2.09	11.19
0.21	4.96	16.88			7.44	3.12	1.19
0.46	5.09	17.35			0.97	4.71	10.28

## Sheet: Figure 5F
Change in target size
Error magnitude training size (cm)	Error magnitude 3 times larger (cm)
4.75	0.58
2.41	1.96
2.28	12.11
12.36	1.44
1.32	1.54
2.18	8.92
3.14	8.11
2.81	17.61
2.12	1
9.52	0.83
4.2	19.51
11.7	4.7
9.09	15.56
0.04	7.14
7.1	6.34
1.03	1.23
6.22	0.53
5.64	0.44
7.71	3.12
0.86	0.14
0.62	7.84
6.59	0.75
3.46	2.68
1.11	3.68
2.54	3.81
6.45	2.84
3.62	1.88
4.31	0.46
1.29	2.04
1.37	1.23

## Sheet: Figure 5G
	Untrained speed levels
Magnitude of error generalized (cm)	Magnitude of error substitute (cm)	Magnitude of error ballistic (cm)
0.93	2.67	11.98
0.73	3.79	10.31
0.7	1.46	9.94
0.68	3.43	6.52
0.52	6.04	9.58
0.14	3.34	10.81
8.05	6.53	4.06
1.98	5.63	10.01
3.19	9.51	8.24
3.42	4.17	8.37
0.74	2.9	10.83
0.59	5.61	10.8
0.77	3.38	8.9
0.74	5.44	12.12
4.31	6.48	7.19
0.13	3.53	9.27
10.08	7.9	0.56
0.39	3.73	11.78
2.43	5.21	12.27
4.82	5.98	7.06
0.57	3.53	10.56
3.42	9.61	8.14
2.35	4.24	7.22
0.18	3.04	9.93
4.47	6.04	7.16
3.18	0.52	14.8
1.98	5.2	9.05
5.03	12.05	5.61
4.96	12.06	5.35
4.07	5.56	7.66
