# Supplementary material for: Learning and cognition in highspeed decision making
Source: eLife. 2025 Jun 25;13:RP99634. doi: 10.7554/eLife.99634 (PMC12194133; doi:10.7554/eLife.99634)
Supplement: Figure 6—source data 1. [file elife-99634-fig6-data1.xlsx]

## Sheet: Figure 6B-C
Error to ballistic (cm)						Error to deflected (cm)
Pre	Post 1	Post 2	Post 3	Post 4		Pre	Post 1	Post 2	Post 3	Post 4
19.18	10.98	-10.66	2.36	-4.44		-0.58	5.78	-3.11	1.58	0.87
-16.38	14.38	-5.65	-9.13	-14.72		-1.96	-4.76	-8.31	0.21	-14.84
-18.63	-1.74	-10.35	1.6	1.45		-12.11	2.22	4.4	5.18	1.3
-18.86	-2.08	-4.73	-7.67	2.26		-1.44	3.22	18.92	4.52	-20.17
-4.13	17.95	-8.45	13.15	-11.77		-1.54	-0.54	-3.17	-0.75	1.89
-19.33	-4.12	-10.15	-6.06	7.51		8.92	5.81	-3.39	-3.66	-7.89
-6.04	-15.18	-2.18	-15.57	4.35		-8.11	-2.6	4.22	-0.26	4.35
-9.51	-9.7	-5.03	1.05	-0.75		-17.61	-4.27	-4.21	0.28	-0.08
-8.13	-14.89	-12.53	7.92	-3.3		-1	7.4	1.46	2.96	3.08
-14.23	-14.29	0	-0.99	-0.38		0.83	0.11	-13.2	-2.86	-3.11
17.4	-13.82	-12	0.84	-0.44		-19.51	1.74	11.06	-6.21	1.49
-6.75	2.5	12.31	-3.33	-1.33		4.7	-0.12	6.61	-2.36	2.19
13.47	-3.02	-8.78	-7.48	2.96		15.56	-7.41	4	-14.77	-4.47
8.94	-6.16	24.64	12.16	0.84		-7.14	-5.1	3.4	15.69	1.76
-24.11	-20.09	-15.15	6.32	-5.07		6.34	-14.43	-3.61	-2.89	-15.26
-18.13	-4.5	-4.68	-4.89	2.5		1.23	-12.52	-5.51	-5.42	-6.19
20.76	15.37	5.04	-1.16	20.18		-0.53	4.63	-3.37	2.48	-1.24
-24.24	10.01	11.54	6.82	3.96		0.44	-3.31	-26.24	-0.87	4.19
14.01	-6.9	-3.13	-5.31	-1.79		3.12	-1.32	-7.95	7.38	-11.89
-11.32	11.6	-5.65	4.01	-3.18		0.14	2.43	-14.55	0.35	1.22
16.85	-12.57	-18.31	-3.06	4.67		7.84	2.23	1.62	0.52	5.48
16.82	-11.89	-8.06	-4.85	3.05		-0.75	3.92	-15.38	-7.96	4.56
-18.95	-19.73	-9.67	21.76	3.66		2.68	3.92	-1.74	-27.43	6.89
-18.68	-4.44	-10.56	4.63	-5.86		-3.68	5.21	1.18	2.91	-1.45
0.57	-12.74	-8.22	-5.05	-0.2		3.81	-4.52	6.35	6.91	-12.12
-21.45	-6.96	-7.49	4.54	2.84		-2.84	-8.24	-8.28	0.67	-4.3
18.02	-9.89	-13.76	1.19	-11.61		-1.88	-12.69	-6.5	4.74	-2.65
-15.91	-1.26	4.43	-3.26	-1.81		0.46	-9.13	-1.74	6.55	8.32
-14.89	-14.09	-2.59	5.86	20.46		2.04	-17.21	-1.61	-0.24	-2.28
-21.74	4.18	-5.3	-6.86	-2.27		-1.23	-16.45	-3.97	-3.97	-8.89
7.57	-13.78	3.07	3.67	-9.46		2.86	-7.46	3.7	2.16	-22.24
18.55	12.92	-9.37	-2.53	-8.28		7.39	2.85	-1.24	6.35	11.8
-20.5	3.76	7.91	6.38	8.56		-0.13	-0.19	-0.92	-17.17	-1.11
-24.06	-14.6	-4.19	-12.18	-4.27		-2.81	-5.29	-1.58	-6.61	-0.51
-18.75	-2.26	3.51	-0.93	-3.77		-5.29	7.51	-3.65	2.75	-3.4
21.59	-11.26	-5.78	16.59	11.23		-6.05	3.53	1.33	13.53	-4.17
-14.59	16.25	-10.72	20.27	1.49		0.65	-2.26	-0.76	-1.79	5
16.07	-5.38	-3.6	-2.36	-1.2		5.85	3.26	0.34	-17.77	12.44
-21.48	-10.43	-2.62	-10.18	-18.18		-4.73	-12.94	-8.33	0.83	6.07
-1.09	-11.9	0.87	1.49	1.93		2.23	3.83	3.46	-5.1	13.54

## Sheet: Figure 6D-F
	Circle				Triangle
Error (cm)	Latency (ms)	Bending duration (ms)		Error (cm)	Latency (ms)	Bending duration (ms)
-27.43	52	18		4.54	66	28
2.91	76	22		1.19	38	32
6.91	66	26		-3.26	66	24
0.67	40	20		5.86	50	22
4.74	64	26		-6.86	64	24
6.55	62	24		3.67	50	24
-0.24	72	30		-2.53	66	24
-3.97	58	20		6.38	56	26
2.16	62	26		-12.18	46	24
6.35	70	26		-0.93	68	18
-17.17	58	22		16.59	60	22
-6.61	48	20		20.27	62	24
2.75	70	24		-2.36	50	22
13.53	70	22		-10.18	78	26
-1.79	66	22		1.49	58	18
-17.77	48	18		-4.44	60	28
0.83	86	20		-14.72	54	26
-5.1	44	30		1.45	78	22
0.87	54	24		2.26	60	24
-14.84	72	18		-11.77	44	30
1.3	58	22		7.51	76	24
-20.17	56	18		4.35	48	20
1.89	54	26		-0.75	58	26
-7.89	54	14		-3.3	58	30
4.35	66	30		-0.38	66	24
-0.08	62	22		-0.44	62	22
3.08	64	22		-1.33	76	26
-3.11	68	22		2.96	60	24
1.49	32	40		0.84	72	26
2.19	38	16		-5.07	56	26
-4.47	58	16		2.5	58	22
1.76	44	18		20.18	54	20
-15.26	70	18		3.96	40	22
-6.19	74	22		-1.79	52	20
-1.24	54	24		-3.18	56	20
4.19	46	18		4.67	56	26
-11.89	60	24		3.05	58	24
1.22	56	30		3.66	46	20
5.48	52	26		-5.86	62	24
4.56	62	26		-0.2	62	18
6.89	48	26		2.84	52	20
-1.45	66	22		-11.61	66	26
-12.12	56	24		-1.81	56	26
-4.3	58	22		20.46	80	24
-2.65	56	26		-2.27	80	22
8.32	42	24		-9.46	60	24
-2.28	60	18		-8.28	58	18
-8.89	60	26		8.56	36	24
-22.24	44	18		-4.27	74	20
11.8	48	24		-3.77	98	28
-1.11	56	18		11.23	58	18
-0.51	50	18		1.49	64	18
-3.4	58	24		-1.2	92	24
-4.17	54	22		-18.18	52	20
5	60	24		1.93	52	24
12.44	72	26		-5.36	48	18
6.07	38	20		14.92	52	18
13.54	46	22		-1.77	44	20
-5.04	62	18		-4.18	56	18
-13.82	64	18		-5.62	76	24
				0.73	52	18
				-3.36	48	20
				0.87	64	20
				5.74	52	24
				-11.4	50	22
				-9.13	48	28
				0.6	58	24
				-9.36	58	18
				2.69	66	28
				5.75	44	18
				-1.57	50	20
				-14.71	54	20
				-0.16	94	22
				-14.3	70	20
				2.13	68	20
				1.97	48	20
				8.73	56	16
				4.16	48	18
				-13.66	64	24
				-9.67	80	26
				-9.04	64	20
				-3.51	62	18
				-2.94	52	18
				-0.71	50	24
				-4.39	84	26
				18.28	68	24
				7.54	72	18
				-5.72	86	20
				-0.7	68	24
				-2.61	46	16
				0.9	54	24
				-6.2	64	20
				-18.15	56	18
				-6	76	14
				-3.1	68	22
				-2.04	68	20
				0.15	52	22
				-4.03	80	24
				-0.46	54	20
				-7.35	52	24
				2.66	48	24
				-3.47	56	30
				0.45	90	24
				4.67	76	20
				-3.66	58	24
				-1.58	76	18
				-11.04	72	20
				3.91	62	18
				-7.07	76	26
				4.54	52	20
				-12.15	64	22
				-7.33	54	20
				-0.8	38	16
				1.88	64	22
				-1.81	62	20
				-15.52	62	20
				3.4	62	20
				8.05	72	30
				-16.25	50	18
				3.36	60	20
				-1.98	54	18
				1.09	54	20
				0.78	50	18
				5.27	58	18
				-5.25	72	24
				2.04	72	20
				0.08	68	18
				-5.11	64	22
				-10.37	50	24
				-5.05	70	32
				1.76	40	16
				5.69	42	24
				3.39	66	20
				-2.65	52	30
				0.56	62	22
				2.02	62	26
				0.04	54	34
				5.27	54	20
				2.4	40	16
				-3.24	58	30
				0.05	56	30
				-3.79	66	32
				1.96	76	16
				5.78	62	24
				3.93	54	20
				9.83	64	22
				4.6	58	22
				6.33	64	20
				-9.09	68	20
				1.71	66	26
				-1.74	58	22
				-0.75	66	22
				5.03	56	30
				2.45	42	28
				-14.14	76	20
				4.3	60	20
				1.68	62	22
				-13.89	68	20
				-4.76	76	24
				-0.26	78	24
				-3.17	42	26
				-18.21	60	22
				-0.19	48	22
				0.35	46	18
				0.95	58	24
				-6.45	78	20
				-4.89	46	24
				-2.35	48	26
				-5.69	48	26
				-2.05	78	32
				-0.02	68	22
				6.85	40	24
				-2.68	54	22
				1.92	52	24
				-15.1	54	28
				-1.12	74	20
				5.7	62	22
				-1.57	78	20
				-3.39	52	26
				2.08	62	28
				5.59	54	16
				6.85	66	18
				-0.04	92	22
				-2.83	64	24
				-0.4	66	18
				1.14	64	26
				1.71	60	26

## Sheet: Figure 6G
fish 1					fish 2					fish 3
Error to deflected - circle shown	Error to deflected - triangle shown	Error to ballistic - circle shown	Error to ballistic - triangle shown		Error to deflected - circle shown	Error to deflected - triangle shown	Error to ballistic - circle shown	Error to ballistic - triangle shown		Error to deflected - circle shown	Error to deflected - triangle shown	Error to ballistic - circle shown	Error to ballistic - triangle shown
1.27	-5.32	-14.95	9.55		4.54	-19.8	-10.82	-7.79		0.85	-11.36	15.82	1.87
-13.46	-11.81	-0.39	0.74		-5.99	-13.61	-5.12	-0.3		5.81	-15.84	-10.03	-1.89
-1.58	-16.73	-11.79	-4.87		-2.94	0.38	-11.24	14.34		1.86	-9.06	-14.44	6.38
1.34	-11.71	-9.92	1.32		6.51	-15.24	-8.27	-2.79		-3.46	16.24	-23.22	2.78
-3.47	-6.63	-18.81	6.65		4.42	10.44	-21.59	-2.33		-3.68	-2.68	-26.33	11.28
-5.17	11.76	8.98	-1.67		-6.27	17.43	5.72	1.19		-0.59	-13.25	-21.42	0.83
-2.32	-15.82	-13.6	-4.42		6.76	13.22	-9.41	-0.24		-0.39	-13.16	14.57	-0.63
0	-16.93	-23.76	-5.74		-3.36	14.72	7.6	1.27		-12.7	-3.34	3.24	11.49
2.37	-12.87	16.03	-0.01		-6.15	-4.2	8.2	10.5		-8.26	-15.17	-7.88	0.67
-4.1	-5.14	-8.57	9.04		5.87	-8.89	14.87	3.74		15.71	-14.23	0.76	0.84
-3.31	0.59	-18.25	14.93		1.6	-14.64	-11.43	-1.98		-17.98	-14.16	-2.49	0.85
8.74	-6.02	-24.73	7.76		0.67	-0.46	-16.83	15.73		3.72	-18.78	-12.25	-7.15
17.96	5.27	-5.25	-6.77			13.68		0.36		-0.1	0.28	-25.87	-15.32
7.94	-12.05	-18.7	-0.09			-17.77		-5.85			-19.23		5.83
6.5	-16.32	-6.66	0.49			-19.25		-8.4			-13.57		1.13
-1.63	-10.22	13.33	3.07			-7.55		-6.6			-6		9.26
6.54	-13.41	8.83	-1.02			-6.1		7.08			-17.33		4.01
-14.74	-13.41	1.07	-0.15			0.45		13.87			-21.48		-9.36
11.19	7.71	-4.68	-5.7			-13.88		2.02			-1.67		11.56
	-15.37		-2.34			-10.78		2.16			-4.67		-17.16
	9.28		-6.96			3.23		-8.97			13.25		0.18
	-13.49		-1.13			-10.54		2.24			2.8		-9.24
	-13.57		-0.74			-12.34		0.21			17.19		0.97
	-12.8		-0.52			-16.73		3.31			-21.67		-9.17
	-13.72		-0.48			-15.09		1.53			13.67		0.23
	4.29		-8.77			-17.83		4.59			-12.11		-1.36
	-9.54		3.68			-11.65		1.94			11.65		-4.63
	-13.56		0.11			-20.44		-7.7			8.71		-4.13
	6.65		-5.59			-5.02		9.14			-15.96		-1.61
	-11.7		0.86			-8.88		-7.13			17.05		0.87
	-5.48		-7.93			-15.88		-3.87
	3.98		-17.41
	11.99		25.44
	12.98		-0.08
	12.76		-3.5
	10.99		-2.08
	-2.31		-15.02
	5.02		-6.82
