# Supplementary material for: Learning and cognition in highspeed decision making
Source: eLife. 2025 Jun 25;13:RP99634. doi: 10.7554/eLife.99634 (PMC12194133; doi:10.7554/eLife.99634)
Supplement: Figure 7—source data 1. [file elife-99634-fig7-data1.xlsx]

## Sheet: Figure 7
Error (cm)
2s before - triangle	2s before - circle	during decision - triangle	during decision - circle
4.54	-27.43	9.55	0.85
1.19	2.91	1.87	4.54
-3.26	6.91	-18.22	5.81
5.86	0.67	-1.89	8.74
-6.86	4.74	-0.3	1.27
3.67	6.55	14.34	11.19
-2.53	-0.24	1.19	-1.63
6.38	-3.97	0.86	1.86
-12.18	2.16	6.38	3.52
-0.93	6.35	10.5	-5.17
16.59	-17.17	11.28	6.76
20.27	-6.61	-3.5	-0.39
-2.36	2.75	11.49	-12.7
-10.18	13.53	15.73	6.54
1.49	-1.79	-15.29	-8.26
-4.44	-17.77	9.04	-14.74
-14.72	0.83	0.67	15.71
1.45	-5.1	-6.6	-17.98
2.26	0.87	14.93	3.72
-11.77	-14.84	7.76	-6.15
7.51	1.3	-15.32	17.96
4.35	-20.17	2.02	1.6
-0.75	1.89	1.13	7.94
-3.3	-7.89	0.49	-5.99
-0.38	4.35	12.71	-2.94
-0.44	-0.08	1.53	-13.46
-1.33	3.08	9.26	-1.58
2.96	-3.11	1.94	1.34
0.84	1.49	-6.96	6.51
-5.07	2.19	0.97	-3.47
2.5	-4.47	9.14	-3.46
20.18	1.76	-4.63	4.42
3.96	-15.26	-7.13	-6.27
-1.79	-6.19	-1.61	-3.68
-3.18	-1.24	0.87	-0.59
4.67	4.19	0.74	6.5
3.05	-11.89	-4.87	-2.32
3.66	1.22	-7.79	0
-5.86	5.48	-9.02	2.37
-0.2	4.56	25.44	-4.1
2.84	6.89	1.32	18.31
-11.61	-1.45	-3.26	0.67
-1.81	-12.12	6.65	-3.36
20.46	-4.3	-2.79	-3.31
-2.27	-2.65	-2.33	-0.1
-9.46	8.32	-1.67	5.87
-8.28	-2.28	-0.24
8.56	-8.89	1.27
-4.27	-22.24	2.78
-3.77	11.8	-0.08
11.23	-1.11	3.74
1.49	-0.51	0.83
-1.2	-3.4	-4.42
-18.18	-4.17	-0.63
1.93	5	-1.98
-5.36	12.44	-2.08
14.92	6.07	0.36
-1.77	13.54	-5.85
-4.18	-5.04	-5.74
-5.62	-13.82	-0.01
0.73		3.68
-3.36		-8.4
0.87		4.5
5.74		-7.93
-11.4		0.84
-9.13		0.85
0.6		0.11
-9.36		7.08
2.69		-5.59
5.75		13.87
-1.57		-7.15
-14.71		5.83
-0.16		2.16
-14.3		-8.97
2.13		-6.77
1.97		2.24
8.73		-0.09
4.16		3.07
-13.66		-1.02
-9.67		0.21
-9.04		-15.02
-3.51		-0.15
-2.94		3.31
-0.71		-5.7
-4.39		-1.94
18.28		-2.34
7.54		4.01
-5.72		4.59
-0.7		-9.36
-2.61		11.56
0.9		8.27
-6.2		-17.16
-18.15		-9.56
-6		0.18
-3.1		-1.13
-2.04		-0.74
0.15		-9.24
-4.03		-11.93
-0.46		-9.17
-7.35		0.23
2.66		-0.52
-3.47		-7.7
0.45		-1.36
4.67		-6.82
-3.66		-17.41
-1.58		-0.48
-11.04		-4.13
3.91		-8.77
-7.07		-3.87
4.54
-12.15
-7.33
-0.8
1.88
-1.81
-15.52
3.4
8.05
-16.25
3.36
-1.98
1.09
0.78
5.27
-5.25
2.04
0.08
-5.11
-10.37
-5.05
1.76
5.69
3.39
-2.65
0.56
2.02
0.04
5.27
2.4
-3.24
0.05
-3.79
1.96
5.78
3.93
9.83
4.6
6.33
-9.09
1.71
-1.74
-0.75
5.03
2.45
-14.14
4.3
1.68
-13.89
-4.76
-0.26
-3.17
-18.21
-0.19
0.35
0.95
-6.45
-4.89
-2.35
-5.69
-2.05
-0.02
6.85
-2.68
1.92
-15.1
-1.12
5.7
-1.57
-3.39
2.08
5.59
6.85
-0.04
-2.83
-0.4
1.14
1.71
